# Supplementary material for: High-throughput isolation of giant viruses using high-content screening
Source: PubMed Central journal article supplement (PMC6584669; doi:10.1038/s42003-019-0475-6), 2019-06-19
Supplement: 42003_2019_475_MOESM1_ESM.pdf [file 42003_2019_475_MOESM1_ESM.pdf]

## Supplementary Figures

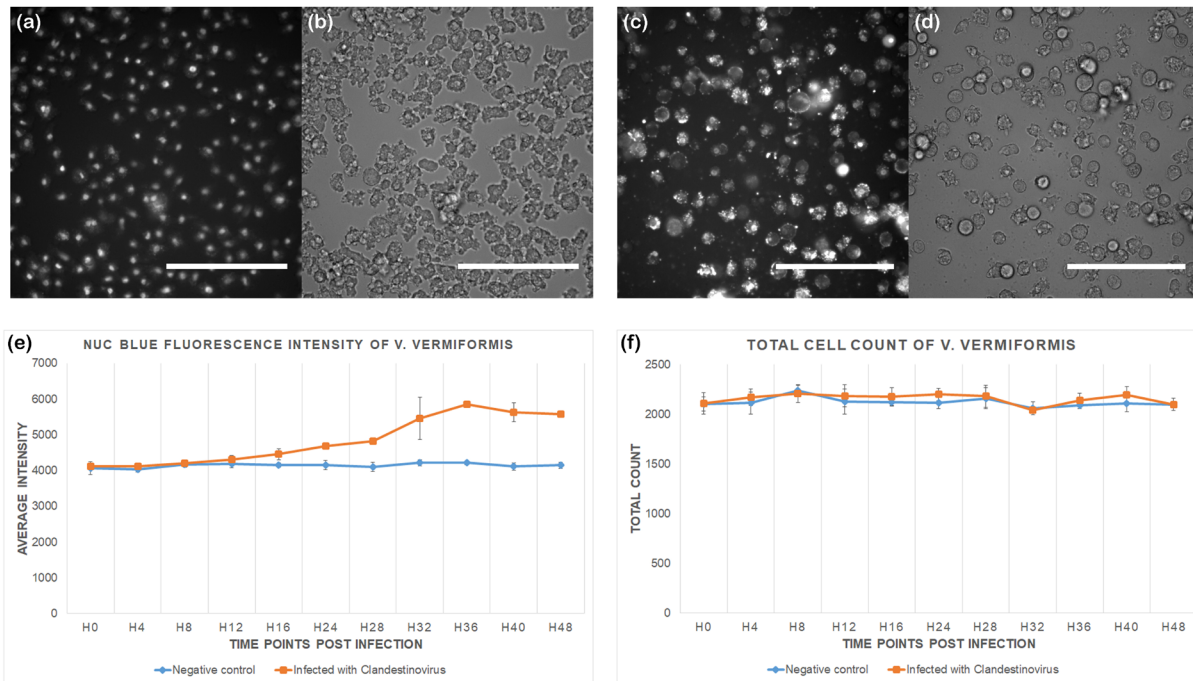

**Supplementary figure 1: *V. vermiformis* infected with a non-lytic Clandestinovirus analyzed by High Content Screening. Cells are stained with Nuc Blue. (a) and (b) Nuc Blue and brightfield channels respectively for the negative control at 48 h pi. (c) and (d) Nuc Blue and brightfield channels respectively for Clandestinovirus at 48 h pi (40x magnification). The scale bars indicate 50  $\mu\text{m}$ . (e) Nuc Blue average fluorescence intensity, (f) Total cell count. The mean values are represented for each parameter. Error bars represent standard deviations. Experiments were performed in triplicate (n =3).**

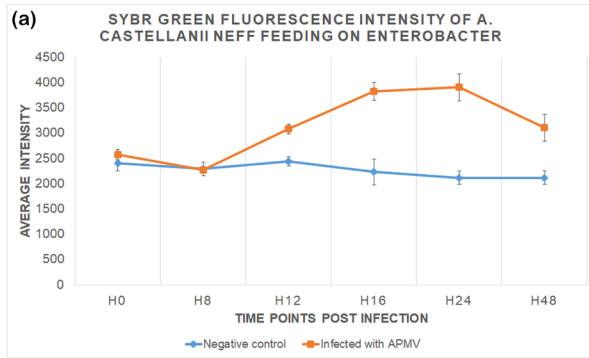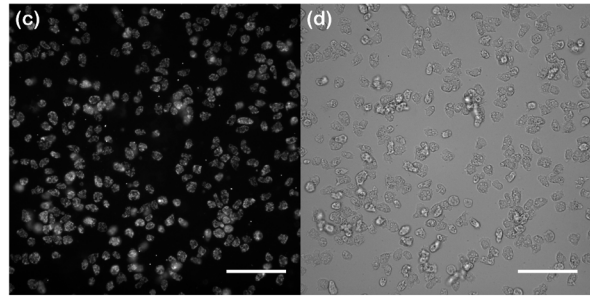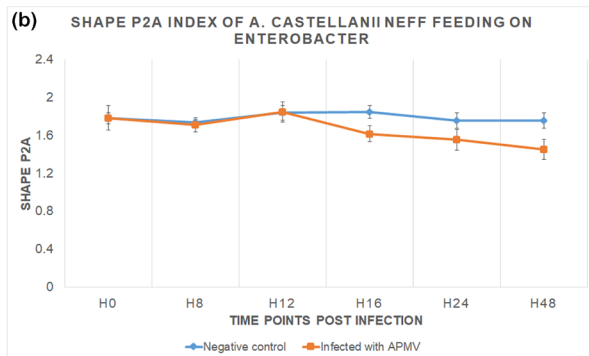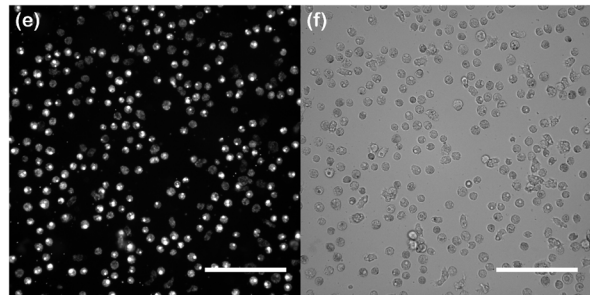

**Supplementary figure 2: Xenic culture of *A. castellanii* Neff feeding on *Enterobacter aerogenes* analysed by High Content Screening. Cells are stained with SYBR Green. Uninfected *A. castellanii* Neff feeding on bacteria served as a negative control. (a) SYBR Green Average Intensity, (b) Cell Shape P2A Index. The mean values are represented for each parameter. Error bars represent standard deviations. (c) and (d) SYBR Green and brightfield channels respectively for the negative control at 16 h pi. (e) and (f) SYBR Green and brightfield channels respectively for APMV at 16 h pi (40x magnification). The scale bars indicate 100  $\mu$ m. Experiments were performed in triplicate (n = 3)**

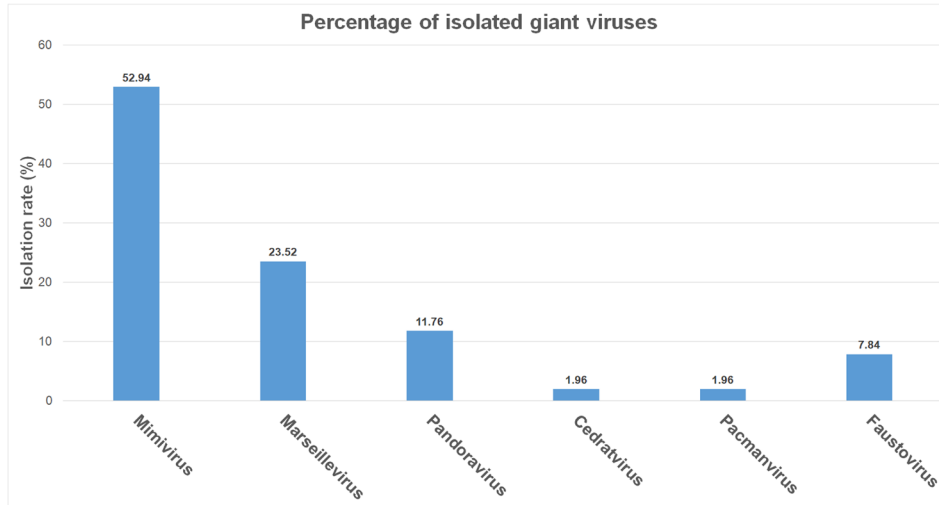

**Supplementary figure 3: Percentage of giant viruses isolated by the new High Content Screening strategy. In this figure, we present the giant viruses isolated from the environmental samples tested by our new isolation strategy (n = 80).**

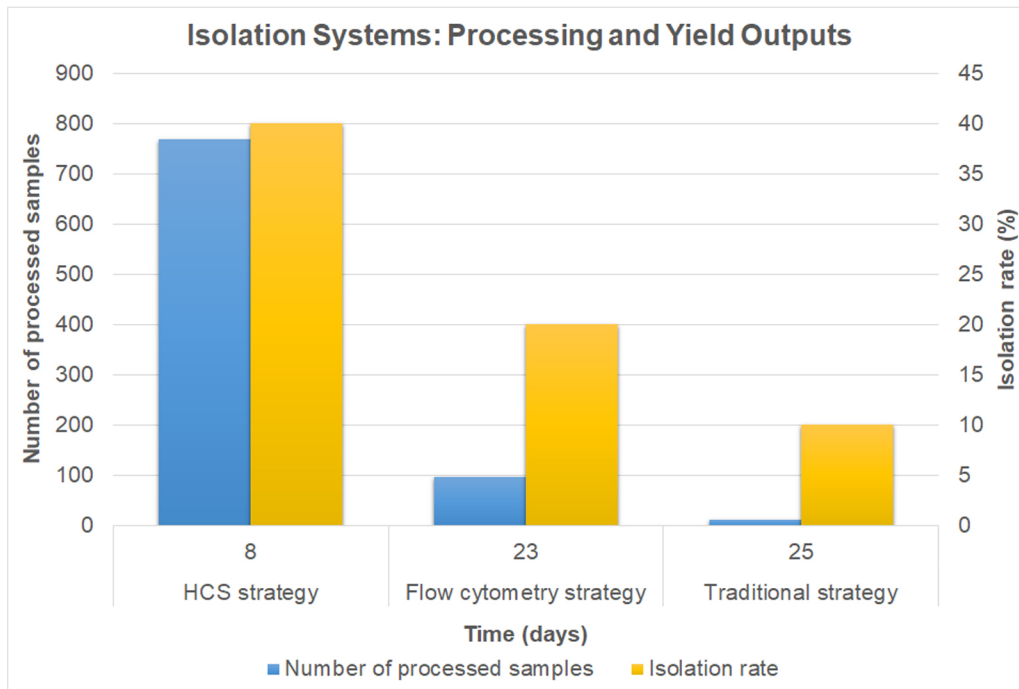

**Supplementary figure 4: Processing and yield outputs of the different isolation systems (n = 80).**

## Supplementary Tables

| Sample type             | Country          | Code | Traditional isolation strategy |                       |                     |                               | New live screening strategy |                       |                     |                               |
|-------------------------|------------------|------|--------------------------------|-----------------------|---------------------|-------------------------------|-----------------------------|-----------------------|---------------------|-------------------------------|
|                         |                  |      | <i>A. castellanii</i> Neff     | <i>V. vermiformis</i> | <i>A. polyphaga</i> | <i>A. castellanii</i> Douglas | <i>A. castellanii</i> Neff  | <i>V. vermiformis</i> | <i>A. polyphaga</i> | <i>A. castellanii</i> Douglas |
| Sewage                  | Algeria          | S3   |                                |                       |                     |                               | Mimivirus                   |                       |                     |                               |
|                         | Algeria          | S4   | Marseillevirus                 |                       | Mimivirus           |                               | Marseillevirus              |                       | Mimivirus           |                               |
|                         | Algers-Algeria   | S7   | Marseillevirus                 |                       | Mimivirus           |                               | Marseillevirus              |                       | Mimivirus           |                               |
|                         | Algers-Algeria   | S8   |                                |                       |                     |                               | Mimivirus                   |                       |                     |                               |
|                         | Algers-Algeria   | S10  |                                |                       |                     |                               | Marseillevirus              |                       |                     |                               |
|                         | Oran-Algeria     | S11  | Marseillevirus + Mimivirus     |                       |                     |                               | Marseillevirus + Mimivirus  |                       |                     |                               |
|                         | Oran-Algeria     | S12  |                                |                       |                     |                               | Mimivirus                   |                       |                     |                               |
|                         | Oran-Algeria     | S13  |                                |                       |                     |                               | Mimivirus                   |                       | Mimivirus           | Mimivirus                     |
|                         | Oran-Algeria     | S15  | Mimivirus                      |                       |                     |                               | Mimivirus                   |                       |                     |                               |
|                         | Oran-Algeria     | S17  | Marseillevirus                 | Faustovirus           |                     |                               | Marseillevirus              | Faustovirus           |                     |                               |
|                         | Oran-Algeria     | S18  | Marseillevirus                 |                       |                     |                               | Marseillevirus              |                       |                     |                               |
|                         | Oran-Algeria     | S19  | Pacmanvirus                    |                       |                     |                               | Marseillevirus+ Pacmanvirus |                       | Mimivirus           |                               |
|                         | Oran-Algeria     | S20  | Marseillevirus                 |                       |                     |                               | Marseillevirus              |                       | Mimivirus           |                               |
|                         | Marseille-France | S41  | Pandoravirus                   |                       |                     |                               | Pandoravirus                |                       |                     |                               |
|                         | Algeria          | A2   | Mimivirus                      |                       | Mimivirus           | Mimivirus                     | Mimivirus                   | Faustovirus           | Mimivirus           | Mimivirus                     |
|                         | Algeria          | A3   | Pandoravirus                   |                       |                     |                               | Pandoravirus                |                       |                     |                               |
| Algeria                 | A6               |      |                                |                       |                     | Mimivirus                     |                             | Mimivirus             |                     |                               |
| Wild boar stool         | Var-France       | S24  |                                |                       |                     |                               |                             |                       | Mimivirus           |                               |
|                         | Var-France       | S25  |                                |                       |                     |                               |                             |                       | Mimivirus           |                               |
|                         | Var-France       | S27  |                                |                       |                     |                               | Pandoravirus                |                       |                     |                               |
| Pigeon saddles          | France           | S45  |                                |                       |                     |                               | Mimivirus                   |                       |                     |                               |
|                         | Algeria          | A5   |                                |                       |                     |                               |                             | Faustovirus           |                     |                               |
| Stool of house sparrows | Marseille-France | S50  |                                |                       |                     |                               | Pandoravirus                |                       |                     |                               |
|                         | Marseille-France | S53  | Pandoravirus                   |                       |                     |                               |                             |                       |                     |                               |
| Lake water              | Algeria          | S5   |                                |                       |                     |                               | Marseillevirus              |                       |                     |                               |
|                         | Oran-Algeria     | S58  |                                |                       |                     |                               | Marseillevirus              |                       |                     |                               |
| Rain water              | La Ciotat-France | S21  | Pandoravirus                   |                       |                     |                               | Pandoravirus                |                       |                     |                               |
| Pool water              | Algeria          | A13  |                                |                       |                     |                               | Mimivirus                   |                       |                     |                               |
| Tank water              | Riboux-France    | S37  |                                |                       |                     |                               | Marseillevirus              |                       |                     |                               |
| Drainage water          | Algeria          | S55  |                                |                       |                     |                               | Mimivirus                   |                       | Mimivirus           | Mimivirus                     |
| Soil                    | Oued-Algeria     | A1   |                                |                       |                     | Mimivirus                     |                             |                       |                     | Mimivirus                     |
| Gutter                  | Algeria          | S57  |                                | Faustovirus           |                     |                               | Marseillevirus              | Faustovirus           |                     |                               |
| Compost                 | La Ciotat-France | S35  | Pandoravirus                   |                       |                     |                               | Pandoravirus + Mimivirus    |                       |                     |                               |
|                         | France           | S38  |                                |                       |                     |                               | Marseillevirus              |                       |                     |                               |
| Alpova sp.              | Var-France       | S29  | Cedratvirus                    |                       |                     |                               | Cedratvirus                 |                       |                     |                               |

**Supplementary Table 1: Giant virus isolates from environmental samples using the traditional flow cytometry isolation strategy and the new HCS isolation strategy.**
